# Supplementary material for: Internal Vibrations of Pyridinium Cation in One-Dimensional Halide Perovskites and the Corresponding Halide Salts
Source: MDPI journal article supplement (doi:10.3390/molecules29010078), 2023-12-22
Supplement: s1 [file s1]

# Internal Vibrations of Pyridinium Cation in One-Dimensional Halide Perovskites and the Corresponding Halide Salts

*Anna Yu. Samsonova<sup>1,\*</sup>, Alena Yu. Mikheleva,<sup>1</sup> Kirill M. Bulanin,<sup>1</sup> Nikita I. Selivanov,<sup>1</sup> Anton S. Mazur,<sup>2</sup> Peter M. Tolstoy,<sup>3</sup> Constantinos C. Stoumpos<sup>1,4,\*</sup> and Yury V. Kapitonov<sup>1</sup>*

1) Photonics of Crystals Laboratory, Saint Petersburg State University, Ulyanovskaya d.1, 198504, St. Petersburg, Russia

2) Magnetic Resonance Research Center, Saint Petersburg State University, Universitetskiy pr. 26, 198504 St. Petersburg, Russia

3) Institute of Chemistry, Saint Petersburg State University, Universitetskiy pr. 26, 198504 St. Petersburg, Russia

4) Department of Materials Science and Technology, University of Crete, Voutes, GR-70013 Heraklion, Greece

Email: a.y.samsonova@spbu.ru, cstoumpos@materials.uoc.gr

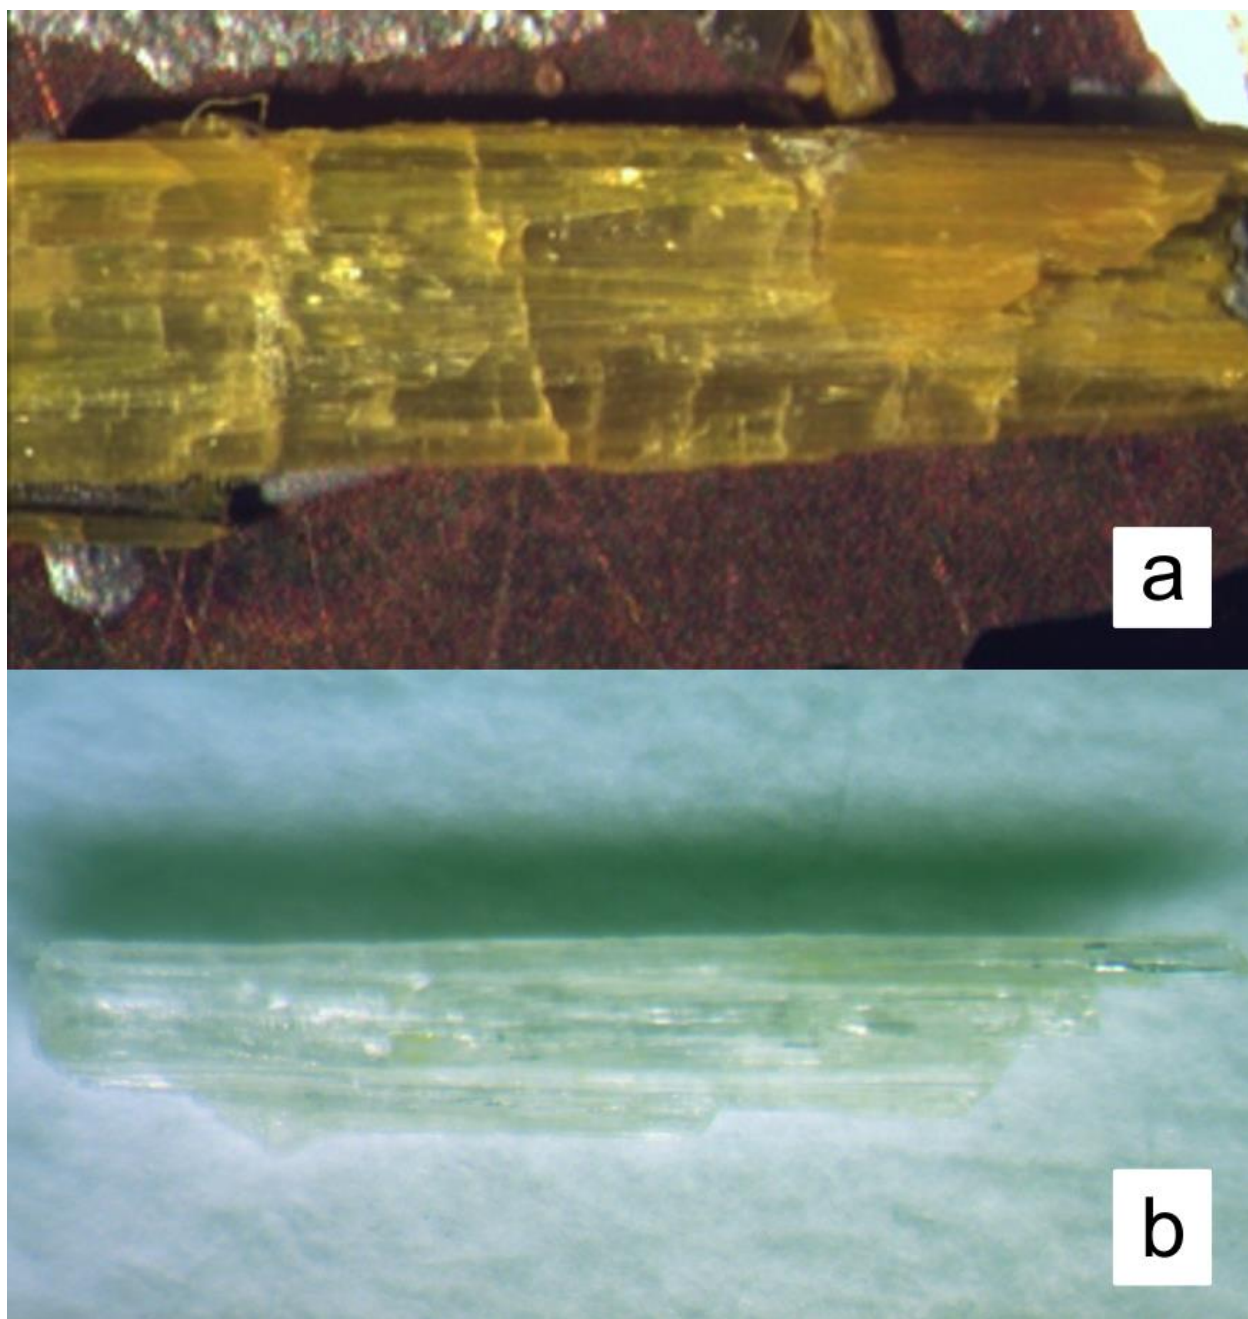

Figure S1. Photos of PyPbI<sub>3</sub> (a) and PyPbBr<sub>3</sub> (b) single crystals.

Table S1. Character table of D<sub>6h</sub> point symmetry group.

| D <sub>6h</sub> | E  | 2C <sub>6</sub> | 2C <sub>3</sub> | C <sub>2</sub> | 3C <sub>2</sub> ' | 3C <sub>2</sub> " | i  | 2S <sub>6</sub> | 2S <sub>3</sub> | σ <sub>h</sub> | 3σ <sub>v</sub> | 3σ <sub>d</sub> | IR | R |
|-----------------|----|-----------------|-----------------|----------------|-------------------|-------------------|----|-----------------|-----------------|----------------|-----------------|-----------------|----|---|
| A <sub>1g</sub> | +1 | +1              | +1              | +1             | +1                | +1                | +1 | +1              | +1              | +1             | +1              | +1              | -  | + |
| A <sub>2g</sub> | +1 | +1              | +1              | +1             | -1                | -1                | +1 | +1              | +1              | +1             | -1              | -1              | -  | - |
| B <sub>1g</sub> | +1 | -1              | +1              | -1             | +1                | -1                | +1 | +1              | -1              | -1             | -1              | +1              | -  | - |
| B <sub>2g</sub> | +1 | -1              | +1              | -1             | -1                | +1                | +1 | +1              | -1              | -1             | +1              | -1              | -  | - |
| E <sub>1g</sub> | +2 | +1              | -1              | -2             | 0                 | 0                 | +2 | -1              | +1              | -2             | 0               | 0               | -  | + |
| E <sub>2g</sub> | +2 | -1              | -1              | +2             | 0                 | 0                 | +2 | -1              | -1              | +2             | 0               | 0               | -  | + |
| A <sub>1u</sub> | +1 | +1              | +1              | +1             | +1                | +1                | -1 | -1              | -1              | -1             | -1              | -1              | -  | - |
| A <sub>2u</sub> | +1 | +1              | +1              | +1             | -1                | -1                | -1 | -1              | -1              | -1             | +1              | +1              | +  | - |
| B <sub>1u</sub> | +1 | -1              | +1              | -1             | +1                | +1                | -1 | -1              | +1              | +1             | +1              | -1              | -  | - |

|          |    |    |    |    |    |    |    |    |    |    |    |    |   |   |
|----------|----|----|----|----|----|----|----|----|----|----|----|----|---|---|
| $B_{2u}$ | +1 | -1 | +1 | -1 | -1 | -1 | -1 | -1 | +1 | +1 | -1 | +1 | - | - |
| $E_{1u}$ | +2 | +1 | -1 | -2 | 0  | 0  | -2 | +1 | -1 | +2 | 0  | 0  | + | - |
| $E_{2u}$ | +2 | -1 | -1 | +2 | 0  | 0  | -2 | +1 | +1 | -2 | 0  | 0  | - | - |

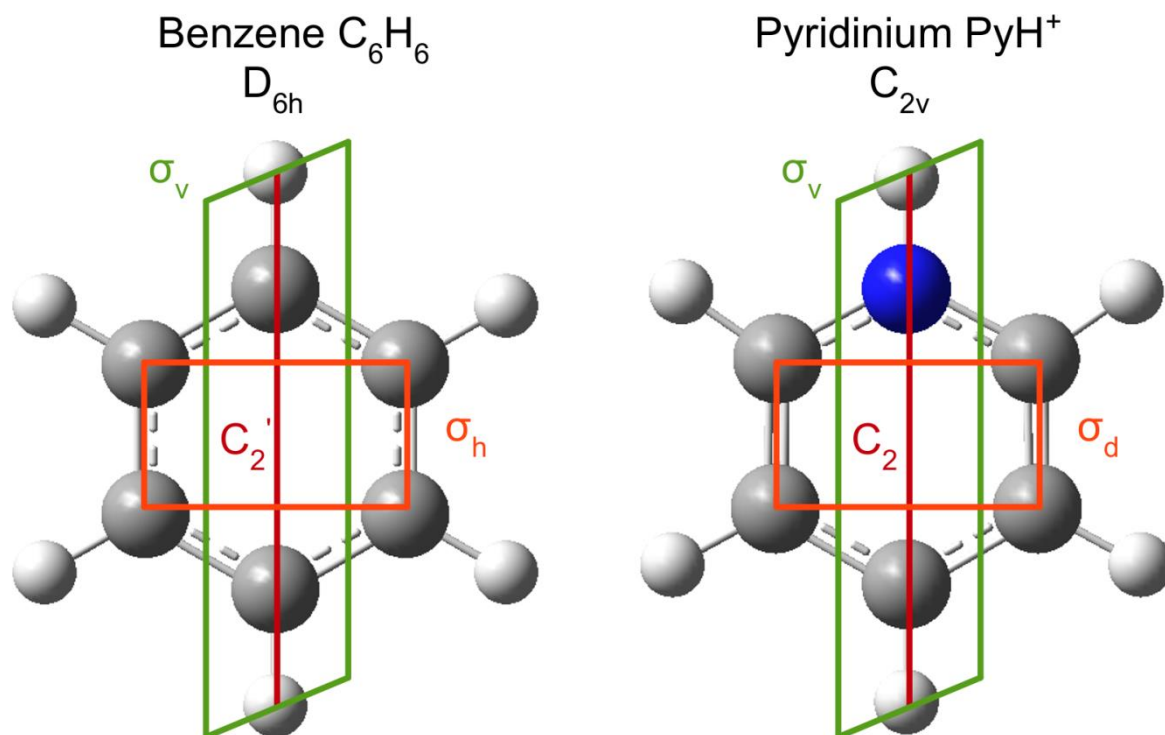

Figure S2. Transformation of  $C_6H_6$  to  $PyH^+$  by symmetry elements.

Table S2. Character table of  $C_{2v}$  point symmetry group.

| $C_{2v}$ | E  | $C_2$ | $\sigma_v$ | $\sigma_d$ | IR | R |
|----------|----|-------|------------|------------|----|---|
| $A_1$    | +1 | +1    | +1         | +1         | +  | + |
| $A_2$    | +1 | +1    | -1         | -1         | -  | + |
| $B_1$    | +1 | -1    | +1         | -1         | +  | + |
| $B_2$    | +1 | -1    | -1         | +1         | +  | + |

Table S3. Correspondence between the irreducible representations of the  $D_{6h}$  and  $C_{2v}$  point symmetry groups.

| $D_{6h}$ | $C_{2v}$  |
|----------|-----------|
| $A_{1g}$ | $A_1$     |
| $A_{2g}$ | $B_2$     |
| $B_{1g}$ | $A_2$     |
| $B_{2g}$ | $B_1$     |
| $E_{1g}$ | $A_2+B_1$ |
| $E_{2g}$ | $A_1+B_2$ |
| $A_{1u}$ | $A_2$     |

|          |           |
|----------|-----------|
| $A_{2u}$ | $B_1$     |
| $B_{1u}$ | $A_1$     |
| $B_{2u}$ | $B_2$     |
| $E_{1u}$ | $A_1+B_2$ |
| $E_{2u}$ | $A_2+B_1$ |

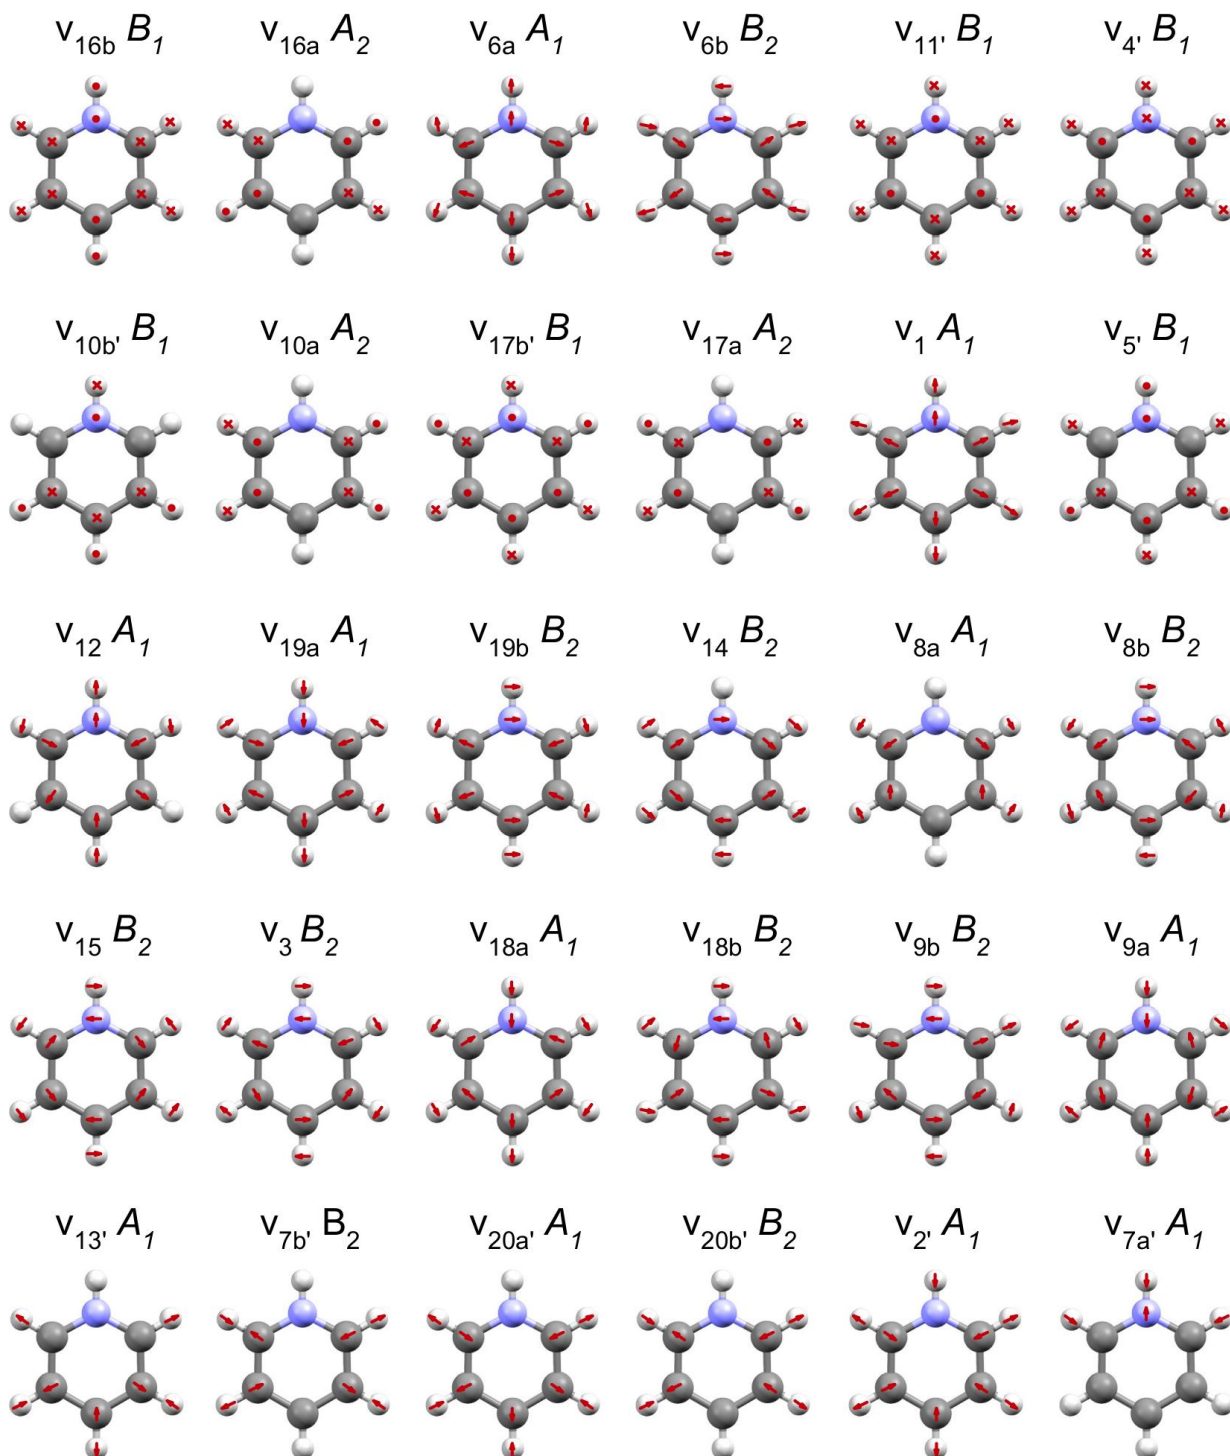

Figure S3. Calculated atomic displacements in internal normal modes of the  $\text{PyH}^+$  cation. The notation in Wilson nomenclature and symmetry of the modes are labeled. Red crosses and dots indicate out-of-plane atomic displacements.

Table S4. Calculated anharmonic fundamental modes (from 1 to 30), overtones (Over) and combination modes (Comb) of the PyH<sup>+</sup> cation.

|    | Wilson       | Freq., cm <sup>-1</sup> | Intencity / (IR), arb.u. |
|----|--------------|-------------------------|--------------------------|
| 1  | $\nu_{16b}$  | 380.823                 | 9.039                    |
| 2  | $\nu_{16a}$  | 393.884                 | 0                        |
| 3  | $\nu_{6a}$   | 616.175                 | 0.119                    |
| 4  | $\nu_{6b}$   | 639.931                 | 2.395                    |
| 5  | $\nu_{11'}$  | 662.532                 | 816.126                  |
| 6  | $\nu_{4'}$   | 743.416                 | 214.622                  |
| 7  | $\nu_{10b'}$ | 833.925                 | 19.379                   |
| 8  | $\nu_{10a}$  | 867.786                 | 0                        |
| 9  | $\nu_{17b'}$ | 974.0                   | 2.16                     |
| 10 | $\nu_{17a}$  | 991.774                 | 0                        |
| 11 | $\nu_1$      | 1002.416                | 14.377                   |
| 12 | $\nu_{5'}$   | 1037.482                | 2.078                    |
| 13 | $\nu_{12}$   | 1029.52                 | 8.18                     |
| 14 | $\nu_{19a}$  | 1061.915                | 8.389                    |
| 15 | $\nu_{19b}$  | 1050.837                | 11.709                   |
| 16 | $\nu_{14}$   | 1185.524                | 12.625                   |
| 17 | $\nu_{8a}$   | 1208.974                | 6.719                    |
| 18 | $\nu_{8b}$   | 1266.874                | 6.005                    |
| 19 | $\nu_{15}$   | 1330.21                 | 26.858                   |
| 20 | $\nu_3$      | 1389.439                | 11.217                   |
| 21 | $\nu_{18a}$  | 1485.738                | 57.755                   |
| 22 | $\nu_{18b}$  | 1536.821                | 131.531                  |
| 23 | $\nu_{9b}$   | 1603.321                | 46.876                   |
| 24 | $\nu_{9a}$   | 1624.768                | 60.12                    |
| 25 | $\nu_{13'}$  | 3031.568                | 3.641                    |
| 26 | $\nu_{7b'}$  | 3087.254                | 2.88                     |
| 27 | $\nu_{20a'}$ | 3066.797                | 4.631                    |
| 28 | $\nu_{20b'}$ | 3106.355                | 16.845                   |
| 29 | $\nu_{2'}$   | 3105.509                | 9.12                     |
| 30 | $\nu_{7a'}$  | 3391.714                | 167.26                   |
|    | Over(1)      | 761.545                 | 0.19                     |
|    | Over(2)      | 787.633                 | 0.014                    |
|    | Over(3)      | 1233.192                | 0.158                    |
|    | Over(4)      | 1280.378                | 0.011                    |
|    | Over(5)      | 1339.733                | 1.227                    |
|    | Over(6)      | 1473.357                | 1.023                    |
|    | Over(7)      | 1666.224                | 1.354                    |
|    | Over(8)      | 1735.248                | 0.655                    |
|    | Over(9)      | 1950.918                | 2.635                    |
|    | Over(10)     | 1982.718                | 0.039                    |
|    | Over(11)     | 2003.549                | 2.2759E-5                |
|    | Over(12)     | 2074.805                | 0.819                    |
|    | Over(13)     | 2058.476                | 0.002                    |
|    | Over(14)     | 2123.059                | 0.178                    |
|    | Over(15)     | 2122.049                | 0.047                    |
|    | Over(16)     | 2373.364                | 0.709                    |
|    | Over(17)     | 2418.213                | 0.17                     |
|    | Over(18)     | 2533.895                | 0.015                    |
|    | Over(19)     | 2654.226                | 0.039                    |
|    | Over(20)     | 2774.339                | 6.915453E-4              |
|    | Over(21)     | 2965.054                | 0.004                    |

|            |          |             |
|------------|----------|-------------|
| Over(22)   | 3089.785 | 0.561       |
| Over(23)   | 3191.119 | 6.004       |
| Over(24)   | 3251.483 | 0.53        |
| Over(25)   | 6060.025 | 0.472       |
| Over(26)   | 6099.457 | 0.066       |
| Over(27)   | 6181.595 | 0.002       |
| Over(28)   | 6213.532 | 1.397357E-4 |
| Over(29)   | 6166.862 | 0.159       |
| Over(30)   | 6640.038 | 2.271       |
| Comb(1-2)  | 774.622  | 0.124       |
| Comb(1-3)  | 997.629  | 0.274       |
| Comb(1-4)  | 1020.277 | 0           |
| Comb(1-5)  | 1050.892 | 0.965       |
| Comb(1-6)  | 1119.208 | 0.089       |
| Comb(1-7)  | 1214.264 | 1.129       |
| Comb(1-8)  | 1243.327 | 8.962       |
| Comb(1-9)  | 1354.948 | 0.19        |
| Comb(1-10) | 1368.591 | 2.056       |
| Comb(1-11) | 1384.281 | 0.002       |
| Comb(1-12) | 1416.888 | 1.266       |
| Comb(1-13) | 1406.18  | 0.008       |
| Comb(1-14) | 1443.087 | 0.018       |
| Comb(1-15) | 1441.709 | 0           |
| Comb(1-16) | 1565.334 | 0           |
| Comb(1-17) | 1589.316 | 0.004       |
| Comb(1-18) | 1648.717 | 0           |
| Comb(1-19) | 1710.409 | 0           |
| Comb(1-20) | 1772.329 | 0           |
| Comb(1-21) | 1866.99  | 0.032       |
| Comb(1-22) | 1919.057 | 0           |
| Comb(1-23) | 1980.131 | 0           |
| Comb(1-24) | 2005.406 | 0.104       |
| Comb(1-25) | 3454.33  | 0.004       |
| Comb(1-26) | 3474.017 | 0           |
| Comb(1-27) | 3469.706 | 3.28492E-5  |
| Comb(1-28) | 3488.65  | 0           |
| Comb(1-29) | 3486.202 | 7.078424E-4 |
| Comb(1-30) | 3772.504 | 0.103       |
| Comb(2-3)  | 1009.713 | 0           |
| Comb(2-4)  | 1035.122 | 0.252       |
| Comb(2-5)  | 1074.37  | 7.503       |
| Comb(2-6)  | 1130.333 | 0.018       |
| Comb(2-7)  | 1221.931 | 1.851       |
| Comb(2-8)  | 1261.084 | 0.247       |
| Comb(2-9)  | 1369.437 | 0.265       |
| Comb(2-10) | 1385.209 | 0.494       |
| Comb(2-11) | 1397.271 | 0           |
| Comb(2-12) | 1429.934 | 0.476       |
| Comb(2-13) | 1422.897 | 0           |
| Comb(2-14) | 1455.459 | 0           |
| Comb(2-15) | 1453.821 | 7.317357E-4 |
| Comb(2-16) | 1579.378 | 4.43048E-5  |
| Comb(2-17) | 1601.677 | 0           |
| Comb(2-18) | 1662.268 | 0.006       |
| Comb(2-19) | 1722.07  | 0.038       |

|            |          |             |
|------------|----------|-------------|
| Comb(2-20) | 1781.577 | 9.160326E-4 |
| Comb(2-21) | 1878.811 | 0           |
| Comb(2-22) | 1933.094 | 0.008       |
| Comb(2-23) | 1994.027 | 0.176       |
| Comb(2-24) | 2017.703 | 0           |
| Comb(2-25) | 3467.58  | 0           |
| Comb(2-26) | 3487.098 | 0.011       |
| Comb(2-27) | 3482.795 | 0           |
| Comb(2-28) | 3501.451 | 0.006       |
| Comb(2-29) | 3499.009 | 0           |
| Comb(2-30) | 3785.637 | 0           |
| Comb(3-4)  | 1255.959 | 0.501       |
| Comb(3-5)  | 1285.704 | 0.001       |
| Comb(3-6)  | 1352.279 | 8.209324E-4 |
| Comb(3-7)  | 1449.322 | 9.729049E-4 |
| Comb(3-8)  | 1483.719 | 0           |
| Comb(3-9)  | 1591.094 | 0.002       |
| Comb(3-10) | 1607.594 | 0           |
| Comb(3-11) | 1614.429 | 13.305      |
| Comb(3-12) | 1652.462 | 7.973667E-4 |
| Comb(3-13) | 1645.913 | 12.304      |
| Comb(3-14) | 1677.543 | 0.152       |
| Comb(3-15) | 1677.722 | 0.219       |
| Comb(3-16) | 1801.781 | 0.02        |
| Comb(3-17) | 1824.892 | 3.935E-7    |
| Comb(3-18) | 1883.811 | 0.011       |
| Comb(3-19) | 1943.912 | 0.009       |
| Comb(3-20) | 2004.475 | 0.008       |
| Comb(3-21) | 2100.618 | 0.037       |
| Comb(3-22) | 2153.639 | 0.038       |
| Comb(3-23) | 2214.778 | 0.041       |
| Comb(3-24) | 2242.86  | 2.8104E-6   |
| Comb(3-25) | 3689.886 | 0.183       |
| Comb(3-26) | 3709.425 | 0.059       |
| Comb(3-27) | 3705.106 | 0.003       |
| Comb(3-28) | 3724.115 | 0.036       |
| Comb(3-29) | 3721.638 | 0.002       |
| Comb(3-30) | 4007.735 | 0.104       |
| Comb(4-5)  | 1309.246 | 0           |
| Comb(4-6)  | 1376.273 | 0           |
| Comb(4-7)  | 1473.567 | 0           |
| Comb(4-8)  | 1507.232 | 0.015       |
| Comb(4-9)  | 1614.748 | 0           |
| Comb(4-10) | 1631.598 | 5.606093E-4 |
| Comb(4-11) | 1645.534 | 14.461      |
| Comb(4-12) | 1675.433 | 0           |
| Comb(4-13) | 1669.41  | 0.851       |
| Comb(4-14) | 1701.751 | 0.596       |
| Comb(4-15) | 1701.149 | 0.183       |
| Comb(4-16) | 1825.734 | 0.067       |
| Comb(4-17) | 1848.601 | 0.012       |
| Comb(4-18) | 1907.811 | 0.142       |
| Comb(4-19) | 1967.871 | 0.05        |
| Comb(4-20) | 2028.277 | 7.044219E-4 |
| Comb(4-21) | 2124.389 | 0.079       |

|            |          |             |
|------------|----------|-------------|
| Comb(4-22) | 2177.607 | 0.126       |
| Comb(4-23) | 2235.835 | 0.058       |
| Comb(4-24) | 2262.83  | 1.28524E-5  |
| Comb(4-25) | 3713.685 | 0.034       |
| Comb(4-26) | 3733.233 | 5.306006E-4 |
| Comb(4-27) | 3728.952 | 0.298       |
| Comb(4-28) | 3747.598 | 0.138       |
| Comb(4-29) | 3745.137 | 0.028       |
| Comb(4-30) | 4031.385 | 9.757207E-4 |
| Comb(5-6)  | 1407.282 | 0.083       |
| Comb(5-7)  | 1504.307 | 6.676       |
| Comb(5-8)  | 1536.752 | 2.074       |
| Comb(5-9)  | 1646.623 | 1.058       |
| Comb(5-10) | 1661.943 | 0.465       |
| Comb(5-11) | 1671.194 | 0.023       |
| Comb(5-12) | 1707.827 | 0.006       |
| Comb(5-13) | 1694.137 | 0.15        |
| Comb(5-14) | 1733.941 | 0.056       |
| Comb(5-15) | 1730.847 | 0           |
| Comb(5-16) | 1855.799 | 0           |
| Comb(5-17) | 1879.096 | 0.004       |
| Comb(5-18) | 1936.881 | 0           |
| Comb(5-19) | 1997.854 | 0           |
| Comb(5-20) | 2058.899 | 0           |
| Comb(5-21) | 2154.906 | 9.941531E-4 |
| Comb(5-22) | 2208.632 | 0           |
| Comb(5-23) | 2269.066 | 0           |
| Comb(5-24) | 2294.362 | 0.003       |
| Comb(5-25) | 3741.929 | 0.012       |
| Comb(5-26) | 3762.076 | 0           |
| Comb(5-27) | 3757.581 | 8.614471E-4 |
| Comb(5-28) | 3775.777 | 0           |
| Comb(5-29) | 3773.359 | 0.07        |
| Comb(5-30) | 4059.804 | 0.082       |
| Comb(6-7)  | 1567.162 | 9.058       |
| Comb(6-8)  | 1604.006 | 1.333       |
| Comb(6-9)  | 1712.865 | 0.534       |
| Comb(6-10) | 1727.935 | 0.027       |
| Comb(6-11) | 1737.838 | 0.068       |
| Comb(6-12) | 1774.366 | 0.128       |
| Comb(6-13) | 1765.178 | 0.011       |
| Comb(6-14) | 1796.419 | 0.015       |
| Comb(6-15) | 1796.92  | 0           |
| Comb(6-16) | 1922.647 | 0           |
| Comb(6-17) | 1945.826 | 0.002       |
| Comb(6-18) | 2004.236 | 0           |
| Comb(6-19) | 2065.033 | 0           |
| Comb(6-20) | 2125.147 | 0           |
| Comb(6-21) | 2221.82  | 0.002       |
| Comb(6-22) | 2275.023 | 0           |
| Comb(6-23) | 2336.225 | 0           |
| Comb(6-24) | 2360.562 | 0.026       |
| Comb(6-25) | 3809.265 | 1.41918E-4  |
| Comb(6-26) | 3827.777 | 0           |
| Comb(6-27) | 3823.703 | 0.021       |



|            |          |             |
|------------|----------|-------------|
| Comb(6-28) | 3843.097 | 0           |
| Comb(6-29) | 3840.564 | 0.058       |
| Comb(6-30) | 4124.558 | 0.32        |
| Comb(7-8)  | 1702.113 | 0.399       |
| Comb(7-9)  | 1809.182 | 5.2         |
| Comb(7-10) | 1824.896 | 1.058       |
| Comb(7-11) | 1835.03  | 0.003       |
| Comb(7-12) | 1868.789 | 0.105       |
| Comb(7-13) | 1862.43  | 0.031       |
| Comb(7-14) | 1894.915 | 0.026       |
| Comb(7-15) | 1895.526 | 0           |
| Comb(7-16) | 2020.24  | 0           |
| Comb(7-17) | 2042.548 | 0.011       |
| Comb(7-18) | 2102.099 | 0           |
| Comb(7-19) | 2166.164 | 0           |
| Comb(7-20) | 2224.368 | 0           |
| Comb(7-21) | 2319.27  | 0.008       |
| Comb(7-22) | 2372.906 | 0           |
| Comb(7-23) | 2431.76  | 0           |
| Comb(7-24) | 2455.798 | 0.019       |
| Comb(7-25) | 3905.539 | 0.008       |
| Comb(7-26) | 3925.563 | 0           |
| Comb(7-27) | 3921.228 | 0.056       |
| Comb(7-28) | 3940.831 | 0           |
| Comb(7-29) | 3938.31  | 0.03        |
| Comb(7-30) | 4213.679 | 0.588       |
| Comb(8-9)  | 1840.652 | 2.385       |
| Comb(8-10) | 1856.93  | 5.312       |
| Comb(8-11) | 1869.538 | 0           |
| Comb(8-12) | 1903.407 | 1.007       |
| Comb(8-13) | 1896.66  | 0           |
| Comb(8-14) | 1929.592 | 0           |
| Comb(8-15) | 1929.21  | 0.095       |
| Comb(8-16) | 2053.658 | 0.01        |
| Comb(8-17) | 2077.823 | 0           |
| Comb(8-18) | 2136.353 | 0.073       |
| Comb(8-19) | 2199.798 | 0.025       |
| Comb(8-20) | 2257.582 | 0.007       |
| Comb(8-21) | 2353.51  | 0           |
| Comb(8-22) | 2406.695 | 0.016       |
| Comb(8-23) | 2467.796 | 0.011       |
| Comb(8-24) | 2491.828 | 0           |
| Comb(8-25) | 3940.779 | 0           |
| Comb(8-26) | 3957.465 | 0.011       |
| Comb(8-27) | 3953.503 | 0           |
| Comb(8-28) | 3971.098 | 0.231       |
| Comb(8-29) | 3968.675 | 0           |
| Comb(8-30) | 4258.824 | 0           |
| Comb(9-10) | 1966.494 | 3.778       |
| Comb(9-11) | 1976.533 | 3.732795E-4 |
| Comb(9-12) | 2012.023 | 0.494       |
| Comb(9-13) | 2004.567 | 0.024       |
| Comb(9-14) | 2036.68  | 0.032       |
| Comb(9-15) | 2036.29  | 0           |
| Comb(9-16) | 2160.832 | 0           |

|             |          |       |
|-------------|----------|-------|
| Comb(9-17)  | 2183.948 | 0.008 |
| Comb(9-18)  | 2241.629 | 0     |
| Comb(9-19)  | 2303.441 | 0     |
| Comb(9-20)  | 2364.247 | 0     |
| Comb(9-21)  | 2460.97  | 0.005 |
| Comb(9-22)  | 2513.673 | 0     |
| Comb(9-23)  | 2574.923 | 0     |
| Comb(9-24)  | 2598.639 | 0.055 |
| Comb(9-25)  | 4047.438 | 0.007 |
| Comb(9-26)  | 4066.35  | 0     |
| Comb(9-27)  | 4061.692 | 0.155 |
| Comb(9-28)  | 4077.259 | 0     |
| Comb(9-29)  | 4075.086 | 0.101 |
| Comb(9-30)  | 4362.859 | 0.089 |
| Comb(10-11) | 1993.185 | 0     |
| Comb(10-12) | 2028.578 | 1.513 |
| Comb(10-13) | 2020.947 | 0     |
| Comb(10-14) | 2053.579 | 0     |
| Comb(10-15) | 2052.607 | 0.006 |
| Comb(10-16) | 2177.47  | 0.03  |
| Comb(10-17) | 2200.402 | 0     |
| Comb(10-18) | 2259.022 | 0.131 |
| Comb(10-19) | 2320.655 | 0.112 |
| Comb(10-20) | 2384.426 | 0.015 |
| Comb(10-21) | 2477.327 | 0     |
| Comb(10-22) | 2530.331 | 0.004 |
| Comb(10-23) | 2591.714 | 0.037 |
| Comb(10-24) | 2615.414 | 0     |
| Comb(10-25) | 4064.495 | 0     |
| Comb(10-26) | 4079.888 | 0.25  |
| Comb(10-27) | 4076.365 | 0     |
| Comb(10-28) | 4095.393 | 0.016 |
| Comb(10-29) | 4092.842 | 0     |
| Comb(10-30) | 4383.047 | 0     |
| Comb(11-12) | 2037.777 | 0.002 |
| Comb(11-13) | 2031.116 | 0.024 |
| Comb(11-14) | 2063.226 | 0.042 |
| Comb(11-15) | 2063.009 | 0.019 |
| Comb(11-16) | 2187.254 | 0.038 |
| Comb(11-17) | 2210.606 | 0.039 |
| Comb(11-18) | 2267.682 | 0.032 |
| Comb(11-19) | 2328.094 | 0.126 |
| Comb(11-20) | 2390.267 | 0.017 |
| Comb(11-21) | 2486.268 | 0.054 |
| Comb(11-22) | 2539.021 | 0.044 |
| Comb(11-23) | 2596.866 | 0.017 |
| Comb(11-24) | 2627.958 | 0.053 |
| Comb(11-25) | 4076.493 | 0.007 |
| Comb(11-26) | 4095.579 | 0.139 |
| Comb(11-27) | 4091.373 | 0.016 |
| Comb(11-28) | 4110.439 | 0.015 |
| Comb(11-29) | 4107.926 | 0.013 |
| Comb(11-30) | 4393.6   | 0.062 |
| Comb(12-13) | 2065.484 | 0.034 |
| Comb(12-14) | 2097.9   | 0.008 |

|             |          |             |
|-------------|----------|-------------|
| Comb(12-15) | 2097.826 | 0           |
| Comb(12-16) | 2221.765 | 0           |
| Comb(12-17) | 2245.41  | 0.004       |
| Comb(12-18) | 2304.332 | 0           |
| Comb(12-19) | 2365.168 | 0           |
| Comb(12-20) | 2424.815 | 0           |
| Comb(12-21) | 2522.48  | 0.001       |
| Comb(12-22) | 2575.223 | 0           |
| Comb(12-23) | 2636.181 | 0           |
| Comb(12-24) | 2661.218 | 0.026       |
| Comb(12-25) | 4100.357 | 0.234       |
| Comb(12-26) | 4126.283 | 0           |
| Comb(12-27) | 4121.194 | 0.011       |
| Comb(12-28) | 4143.182 | 0           |
| Comb(12-29) | 4140.423 | 0.009       |
| Comb(12-30) | 4427.816 | 1.071632E-4 |
| Comb(13-14) | 2090.571 | 0.007       |
| Comb(13-15) | 2091.319 | 2.023199E-4 |
| Comb(13-16) | 2214.774 | 0.007       |
| Comb(13-17) | 2237.818 | 0.153       |
| Comb(13-18) | 2296.51  | 0.059       |
| Comb(13-19) | 2356.466 | 0.003       |
| Comb(13-20) | 2417.463 | 0.182       |
| Comb(13-21) | 2513.249 | 0.009       |
| Comb(13-22) | 2567.489 | 0.066       |
| Comb(13-23) | 2627.466 | 0.146       |
| Comb(13-24) | 2650.97  | 0.018       |
| Comb(13-25) | 4102.104 | 0.414       |
| Comb(13-26) | 4122.409 | 0.321       |
| Comb(13-27) | 4117.95  | 0.033       |
| Comb(13-28) | 4136.298 | 0.053       |
| Comb(13-29) | 4133.846 | 0.26        |
| Comb(13-30) | 4420.192 | 0.341       |
| Comb(14-15) | 2123.052 | 0.076       |
| Comb(14-16) | 2247.592 | 0.067       |
| Comb(14-17) | 2269.779 | 0.096       |
| Comb(14-18) | 2328.284 | 0.104       |
| Comb(14-19) | 2390.049 | 0.002       |
| Comb(14-20) | 2449.843 | 0.615       |
| Comb(14-21) | 2545.464 | 0.014       |
| Comb(14-22) | 2599.13  | 0.084       |
| Comb(14-23) | 2657.914 | 0.117       |
| Comb(14-24) | 2684.797 | 0.127       |
| Comb(14-25) | 4135.475 | 3.2413E-6   |
| Comb(14-26) | 4152.366 | 0.549       |
| Comb(14-27) | 4148.621 | 0.01        |
| Comb(14-28) | 4167.926 | 0.09        |
| Comb(14-29) | 4165.4   | 0.037       |
| Comb(14-30) | 4453.892 | 0.026       |
| Comb(15-16) | 2246.579 | 0.325       |
| Comb(15-17) | 2270.827 | 0.86        |
| Comb(15-18) | 2327.789 | 0.016       |
| Comb(15-19) | 2389.703 | 0.164       |
| Comb(15-20) | 2449.071 | 1.268       |
| Comb(15-21) | 2545.977 | 0.019       |

|             |          |             |
|-------------|----------|-------------|
| Comb(15-22) | 2597.812 | 1.229E-7    |
| Comb(15-23) | 2659.407 | 0.096       |
| Comb(15-24) | 2681.798 | 0.035       |
| Comb(15-25) | 4132.628 | 0.041       |
| Comb(15-26) | 4153.957 | 0.143       |
| Comb(15-27) | 4149.265 | 0.002       |
| Comb(15-28) | 4168.412 | 0.053       |
| Comb(15-29) | 4165.819 | 0.037       |
| Comb(15-30) | 4451.601 | 0.07        |
| Comb(16-17) | 2395.982 | 0.917       |
| Comb(16-18) | 2454.277 | 0.011       |
| Comb(16-19) | 2513.49  | 0.149       |
| Comb(16-20) | 2570.742 | 0.059       |
| Comb(16-21) | 2668.659 | 0.284       |
| Comb(16-22) | 2721.188 | 0.097       |
| Comb(16-23) | 2784.159 | 0.048       |
| Comb(16-24) | 2808.962 | 0.052       |
| Comb(16-25) | 4252.957 | 0.035       |
| Comb(16-26) | 4275.354 | 0.053       |
| Comb(16-27) | 4270.914 | 0.003       |
| Comb(16-28) | 4292.389 | 0.005       |
| Comb(16-29) | 4289.545 | 0.005       |
| Comb(16-30) | 4577.05  | 0.008       |
| Comb(17-18) | 2476.279 | 0.193       |
| Comb(17-19) | 2536.888 | 0.113       |
| Comb(17-20) | 2596.175 | 1.92388E-5  |
| Comb(17-21) | 2691.526 | 0.562       |
| Comb(17-22) | 2747.027 | 0.272       |
| Comb(17-23) | 2808.532 | 0.028       |
| Comb(17-24) | 2830.038 | 0.198       |
| Comb(17-25) | 4282.098 | 0.038       |
| Comb(17-26) | 4298.462 | 0.021       |
| Comb(17-27) | 4294.631 | 0.102       |
| Comb(17-28) | 4312.02  | 0.104       |
| Comb(17-29) | 4310.095 | 0.001       |
| Comb(17-30) | 4600.566 | 5.423092E-4 |
| Comb(18-19) | 2597.274 | 3.948       |
| Comb(18-20) | 2655.467 | 0.451       |
| Comb(18-21) | 2751.365 | 0.296       |
| Comb(18-22) | 2803.746 | 0.253       |
| Comb(18-23) | 2863.424 | 1.189       |
| Comb(18-24) | 2890.104 | 0.182       |
| Comb(18-25) | 4341.703 | 0.029       |
| Comb(18-26) | 4360.661 | 5.92372E-5  |
| Comb(18-27) | 4356.037 | 0.037       |
| Comb(18-28) | 4372.684 | 0.01        |
| Comb(18-29) | 4370.278 | 0.096       |
| Comb(18-30) | 4654.874 | 0.111       |
| Comb(19-20) | 2715.32  | 0.033       |
| Comb(19-21) | 2808.994 | 0.333       |
| Comb(19-22) | 2858.044 | 0.012       |
| Comb(19-23) | 2921.646 | 2.15        |
| Comb(19-24) | 2941.427 | 1.414       |
| Comb(19-25) | 4405.884 | 0.004       |
| Comb(19-26) | 4423.556 | 0.005       |

|             |          |             |
|-------------|----------|-------------|
| Comb(19-27) | 4420.039 | 0.07        |
| Comb(19-28) | 4441.824 | 0.006       |
| Comb(19-29) | 4436.175 | 0.103       |
| Comb(19-30) | 4720.613 | 0.083       |
| Comb(20-21) | 2867.842 | 0.429       |
| Comb(20-22) | 2924.043 | 1.12        |
| Comb(20-23) | 2981.688 | 2.085       |
| Comb(20-24) | 3004.891 | 0.538       |
| Comb(20-25) | 4461.15  | 0.006       |
| Comb(20-26) | 4486.199 | 0.049       |
| Comb(20-27) | 4477.545 | 0.034       |
| Comb(20-28) | 4495.914 | 0.113       |
| Comb(20-29) | 4493.184 | 0.005       |
| Comb(20-30) | 4777.065 | 0.139       |
| Comb(21-22) | 3019.41  | 0.133       |
| Comb(21-23) | 3077.544 | 0.822       |
| Comb(21-24) | 3151.231 | 4.265       |
| Comb(21-25) | 4558.583 | 2.00144E-5  |
| Comb(21-26) | 4584.475 | 0.084       |
| Comb(21-27) | 4571.134 | 0.011       |
| Comb(21-28) | 4595.79  | 0.015       |
| Comb(21-29) | 4595.59  | 0.107       |
| Comb(21-30) | 4876.706 | 0.019       |
| Comb(22-23) | 3131.982 | 0.166       |
| Comb(22-24) | 3172.483 | 1.572       |
| Comb(22-25) | 4612.028 | 5.882E-7    |
| Comb(22-26) | 4628.94  | 0.012       |
| Comb(22-27) | 4628.776 | 0.03        |
| Comb(22-28) | 4646.442 | 0.03        |
| Comb(22-29) | 4650.344 | 0.011       |
| Comb(22-30) | 4927.522 | 0.13        |
| Comb(23-24) | 3226.052 | 0.167       |
| Comb(23-25) | 4676.725 | 0.029       |
| Comb(23-26) | 4695.073 | 0.026       |
| Comb(23-27) | 4688.781 | 0.209       |
| Comb(23-28) | 4708.69  | 0.078       |
| Comb(23-29) | 4707.41  | 0.072       |
| Comb(23-30) | 5000.851 | 0.057       |
| Comb(24-25) | 4697.552 | 0.114       |
| Comb(24-26) | 4718.921 | 0.005       |
| Comb(24-27) | 4712.418 | 0.005       |
| Comb(24-28) | 4737.531 | 0.277       |
| Comb(24-29) | 4720.695 | 0.046       |
| Comb(24-30) | 5014.712 | 0.173       |
| Comb(25-26) | 6155.54  | 0.186       |
| Comb(25-27) | 6128.714 | 0.01        |
| Comb(25-28) | 6178.531 | 0.003       |
| Comb(25-29) | 6173.307 | 0.008       |
| Comb(25-30) | 6465.708 | 0.003       |
| Comb(26-27) | 6121.268 | 0.739       |
| Comb(26-28) | 6168.959 | 0.163       |
| Comb(26-29) | 6163.959 | 0.003       |
| Comb(26-30) | 6485.076 | 2.644044E-4 |
| Comb(27-28) | 6164.296 | 0.029       |
| Comb(27-29) | 6159.911 | 0.197       |

|             |          |       |
|-------------|----------|-------|
| Comb(27-30) | 6480.81  | 0.006 |
| Comb(28-29) | 6141.352 | 0.65  |
| Comb(28-30) | 6500.101 | 0.004 |
| Comb(29-30) | 6497.497 | 0.019 |

Table S5. Combination modes recognized in the experimental vibrational spectra.

|                        | PyHI                    | PyHBr | PyPbI <sub>3</sub> | PyPbBr <sub>3</sub> |
|------------------------|-------------------------|-------|--------------------|---------------------|
|                        | Freq., cm <sup>-1</sup> |       |                    |                     |
| $\nu_{16a}+\nu_{6b}$   | 1034                    | -     | 1034               | 1038                |
| $\nu_{16a}+\nu_{11'}$  | 1077                    | 1088  | 1062               | 1065                |
| $\nu_{16b}+\nu_{10b'}$ | 1264                    | 1278  | 1224               | 1233                |
| $\nu_{16b}+\nu_{17a}$  | -                       | -     | 1356               | 1355                |
| $\nu_{11'}+\nu_{4'}$   | 1423                    | 1430  | 1385               | 1394                |
| $\nu_{16b}+\nu_{5'}$   | -                       | -     | 1394               | 1404                |
| $\nu_1+\nu_{6a}$       | 1609                    | -     | 1611               | 1612                |
| $\nu_1+\nu_{6b}$       | 1643                    | -     | 1642               | -                   |
| $\nu_{12}+\nu_{6a}$    | 1634                    | -     | -                  | -                   |

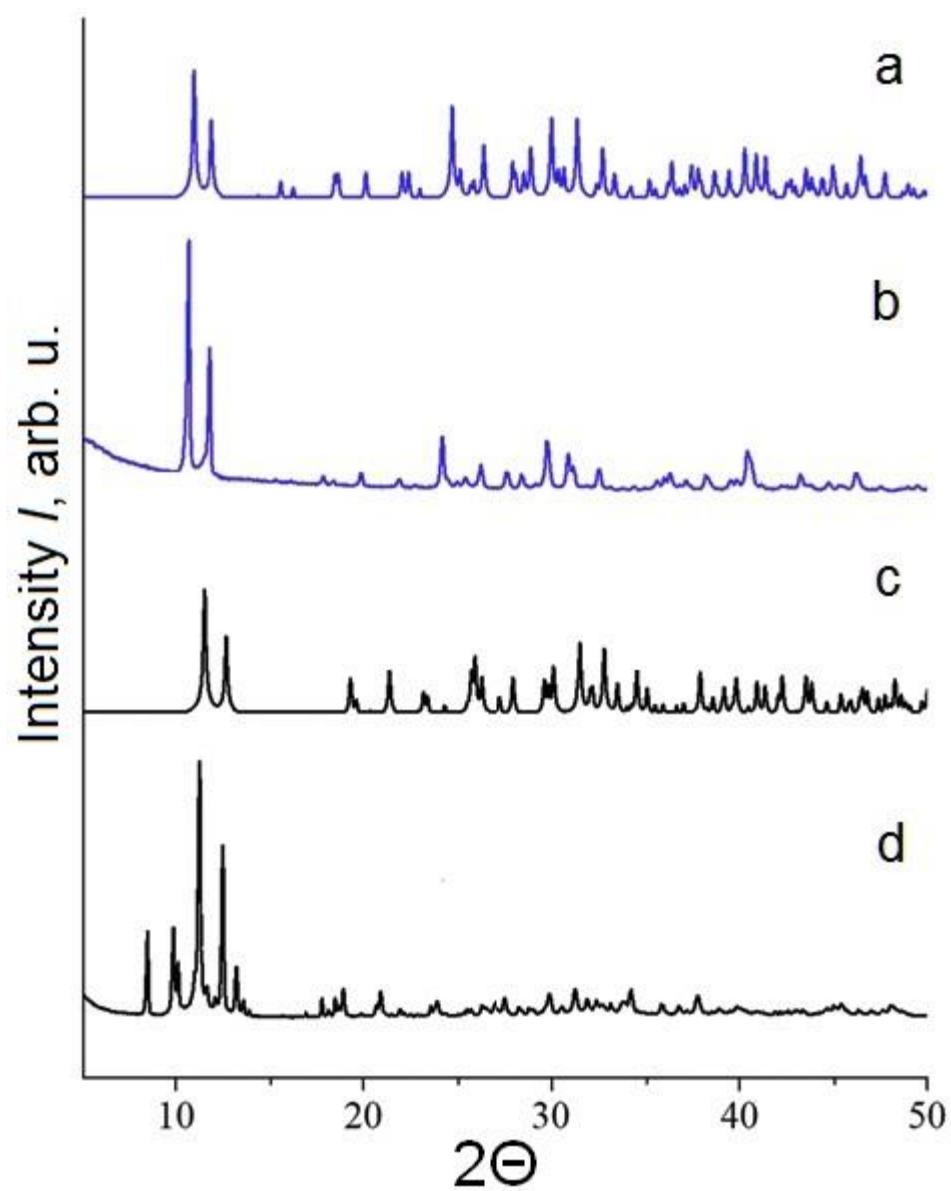

Figure S4. Powder XRD patterns simulated from the single crystal data (a,c) and measured for grounded single crystals (b,d) for  $\text{PyPbI}_3$  (a,b) and  $\text{PyPbBr}_3$  (c,d).

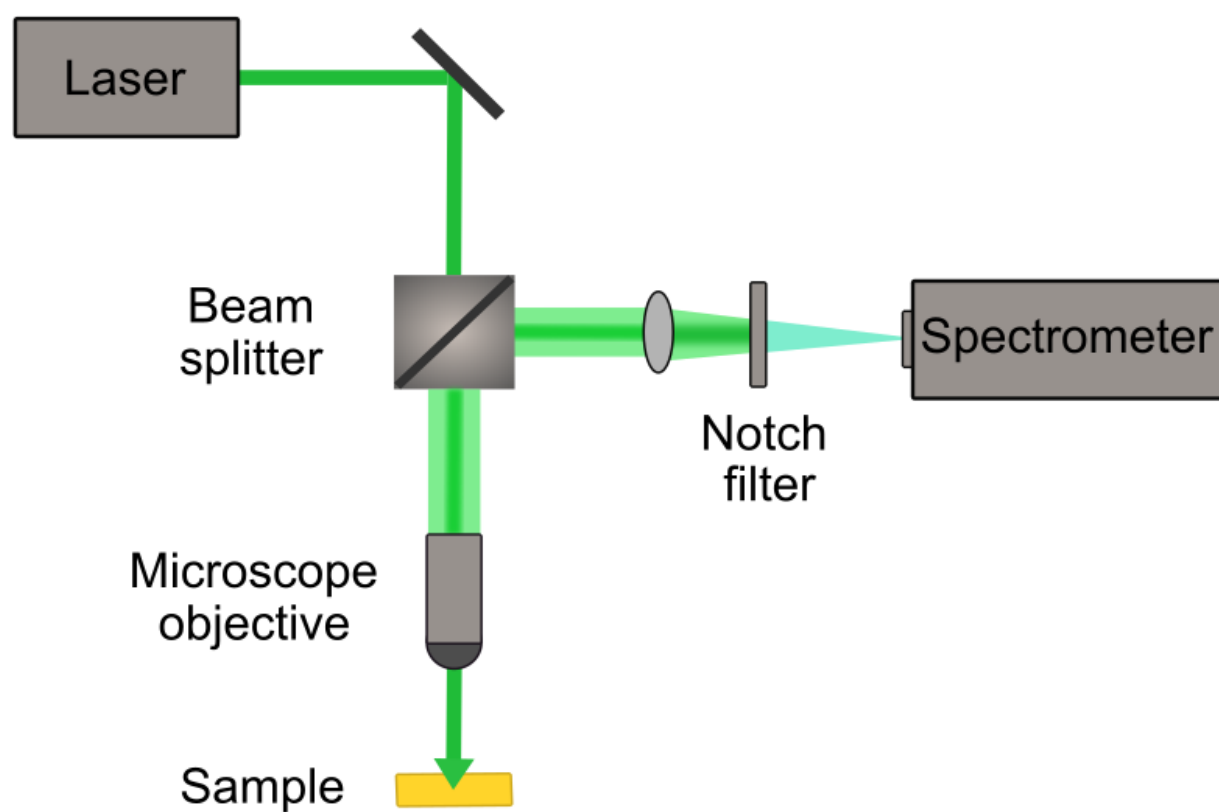

Figure S5. The scheme of the Raman measurement experiment.
